# Supplementary material for: Testosterone treatment and risk of venous thromboembolism: population based case-control study
Source: PubMed Central journal article supplement — BMJ. 2016 Nov 30;355:i5968. doi: 10.1136/bmj.i5968 (PMC5130924; doi:10.1136/bmj.i5968), 2016-11-30
Supplement: marc033569.ww1_default.pdf [file marc033569.ww1_default.pdf]

## Supplementary table

### Sensitivity analyses using 3 and 6 month cut-offs for start of testosterone therapy among current users and 15-, 30- and 60-day grace periods

|                                           | Cases<br>n (%)   | Controls<br>n (%) | Rate ratio (95% CI)       |                           |
|-------------------------------------------|------------------|-------------------|---------------------------|---------------------------|
|                                           |                  |                   | Crude                     | Adjusted <sup>a</sup>     |
| <b>15-day grace period</b>                | 19215            | 909530            |                           |                           |
| No recent T use                           | 19124 (99.53)    | 907444 (99.77)    | 1                         | 1                         |
| Current T use                             | 64 (0.33)        | 1164 (0.13)       | 1.84 (1.41 - 2.41)        | 1.24 (0.93 - 1.66)        |
| T started ≤ 3 months                      | 26 (0.14)        | 477 (0.05)        | 1.95 (1.30 - 2.94)        | 1.39 (0.91 - 2.13)        |
| T started > 3 months                      | 38 (0.20)        | 687 (0.08)        | 1.77 (1.25 - 2.50)        | 1.15 (0.80 - 1.67)        |
| T started ≤ 6 months                      | 36 (0.19)        | 630 (0.07)        | 1.97 (1.39 - 2.81)        | 1.37 (0.95 - 2.00)        |
| T started > 6 months                      | 28 (0.15)        | 534 (0.06)        | 1.69 (1.13 - 2.53)        | 1.10 (0.73 - 1.68)        |
| <b>  T started ≤ 9 months</b>             | <b>42 (0.22)</b> | <b>710 (0.08)</b> | <b>2.02 (1.46 - 2.81)</b> | <b>1.44 (1.02 - 2.04)</b> |
| T started > 9 months                      | 22 (0.11)        | 454 (0.05)        | 1.56 (0.99 - 2.45)        | 0.97 (0.60 - 1.55)        |
| <b>30-day grace period</b>                | 19215            | 909530            |                           |                           |
| No recent T use                           | 19124 (99.53)    | 907433 (99.77)    | 1                         | 1                         |
| Current T use                             | 69 (0.36)        | 1251 (0.14)       | 1.84 (1.42 - 2.38)        | 1.25 (0.94 - 1.66)        |
| T started ≤ 3 months                      | 23 (0.12)        | 395 (0.04)        | 2.07 (1.34 - 3.21)        | 1.49 (0.95 - 2.35)        |
| T started > 3 months                      | 46 (0.24)        | 856 (0.09)        | 1.74 (1.26 - 2.38)        | 1.15 (0.82 - 1.62)        |
| <b>  T started ≤ 6 months<sup>b</sup></b> | <b>36 (0.19)</b> | <b>529 (0.06)</b> | <b>2.26 (1.58 - 3.23)</b> | <b>1.63 (1.12 - 2.37)</b> |
| T started > 6 months <sup>b</sup>         | 33 (0.17)        | 722 (0.08)        | 1.53 (1.06 - 2.21)        | 1.00 (0.68 - 1.47)        |
| <b>  T started ≤ 9 months</b>             | <b>40 (0.21)</b> | <b>635 (0.07)</b> | <b>2.08 (1.48 - 2.92)</b> | <b>1.52 (1.06 - 2.17)</b> |
| T started > 9 months                      | 29 (0.15)        | 616 (0.07)        | 1.58 (1.07 - 2.34)        | 1.00 (0.66 - 1.51)        |
| <b>60-day grace period</b>                | 19215            | 909530            |                           |                           |
| No recent T use                           | 19124 (99.53)    | 907416 (99.77)    | 1                         | 1                         |
| Current T use                             | 72 (0.37)        | 1378 (0.15)       | 1.70 (1.31 - 2.19)        | 1.15 (0.87 - 1.52)        |
| T started ≤ 3 months                      | 15 (0.08)        | 259 (0.03)        | 2.04 (1.18 - 3.53)        | 1.50 (0.86 - 2.62)        |
| T started > 3 months                      | 57 (0.30)        | 1119 (0.12)       | 1.62 (1.22 - 2.15)        | 1.08 (0.79 - 1.47)        |
| <b>  T started ≤ 6 months</b>             | <b>27 (0.14)</b> | <b>407 (0.04)</b> | <b>2.26 (1.50 - 3.41)</b> | <b>1.66 (1.08 - 2.54)</b> |

|                             |                  |                   |                           |                           |
|-----------------------------|------------------|-------------------|---------------------------|---------------------------|
| T started > 6 months        | 45 (0.23)        | 971 (0.11)        | 1.47 (1.07 - 2.02)        | 0.96 (0.68 - 1.35)        |
| <b>T started ≤ 9 months</b> | <b>36 (0.19)</b> | <b>508 (0.06)</b> | <b>2.34 (1.63 - 3.36)</b> | <b>1.76 (1.21 - 2.56)</b> |
| T started > 9 months        | 36 (0.19)        | 870 (0.10)        | 1.33 (0.94 - 1.89)        | 0.83 (0.57 - 1.21)        |

CI: confidence interval; T: testosterone; VTE: venous thromboembolism.

Current testosterone treatment defined as a prescription whose duration included the index date

<sup>a</sup> Adjusted for age, history of primary or secondary hypogonadism, surgical procedures, medical illness, trauma, and active cancer factors in the 90 days before the index day, and for history of cancer 91 or more days prior to the index date. (matching factors), smoking, BMI, alcohol, socioeconomic status, any history of polycythemia, chronic pulmonary disease, diabetes, congestive heart failure, myocardial infarction, peripheral vascular disease and stroke, sexual dysfunction, tiredness and a covariate comprising osteoporosis, infertility, loss of appetite and hot flushes, and use of corticosteroids, megestrol, nonsteroidal anti-inflammatory drugs and antiplatelets.
